# Supplementary material for: Development, Validation, and Application of High-Performance Liquid Chromatography with Diode-Array Detection Method for Simultaneous Determination of Ginkgolic Acids and Ginkgols in Ginkgo biloba
Source: MDPI journal article supplement (doi:10.3390/foods13081250), 2024-04-19
Supplement: s1 [file s1]

## Supplementary Material

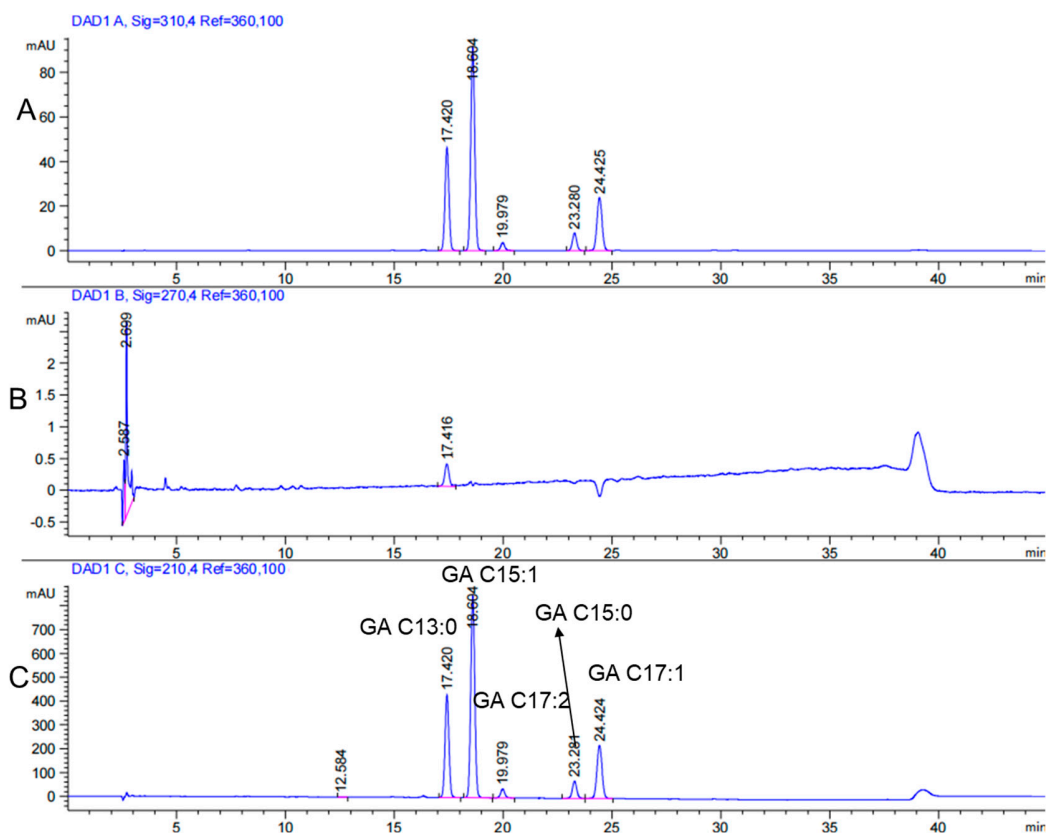

**Figure S1.** Chromatogram of ginkgolic acid mixed standard at 310nm (A), 270 nm (B) and 210 nm (C) by the European Pharmacopoeia methods.

**Table S1.** Linear regression equation, correlation coefficient, linear range, and LOD of ginkgols.

| Ginkgol | Standard curve       | $R^2$  | Linear range (ppm) | Limit of detection (ppm) | Limit of quantification (ppm) |
|---------|----------------------|--------|--------------------|--------------------------|-------------------------------|
| C13:0   | $y = 15785x + 3.10$  | 0.9998 | 0.35-56.56         | 0.61                     | 2.01                          |
| C15:1   | $y = 11592x + 2.81$  | 0.9999 | 0.27-53.00         | 0.50                     | 1.65                          |
| C17:1   | $y = 8699.9x + 0.57$ | 0.9999 | 1.39-69.40         | 0.06                     | 0.20                          |

**Table S2.** Coefficients of the eigenvectors were taken from different principal components analysis for compounds.

| Compound       | PC1      | PC2      | PC3      |
|----------------|----------|----------|----------|
| GA C13:0       | 0.4222   | -0.01345 | -0.04245 |
| GA C15:1       | 0.34351  | 0.41681  | 0.19673  |
| GA C17:1       | 0.35682  | 0.38546  | 0.16816  |
| Total GA       | 0.36034  | 0.3757   | 0.16568  |
| G C13:0        | -0.14599 | 0.51813  | -0.83165 |
| G C15:1        | -0.36905 | 0.34138  | 0.16371  |
| G C17:1        | -0.38126 | 0.25864  | 0.33343  |
| Total ginkgols | -0.37909 | 0.29064  | 0.27231  |

**Table S3.** Pearson correlation showing the relationship between ginkgolic acids and ginkgols.

| Compound       | GA C13:0 | GA C15:1 | GA C17:1 | Total GA | G C13:0 | G C15:1 | G C17:1 | Total ginkgols |
|----------------|----------|----------|----------|----------|---------|---------|---------|----------------|
| GA C13:0       | 1        |          |          |          |         |         |         |                |
| GA C15:1       | 0.79504  |          |          |          |         |         |         |                |
| GA C17:1       | 0.82825  | 0.99835  |          |          |         |         |         |                |
| Total GA       | 0.8369   | 0.99735  | 0.99988  |          |         |         |         |                |
| G C13:0        | -0.33806 | 0.02387  | -0.00352 | -0.01451 |         |         |         |                |
| G C15:1        | -0.87849 | -0.43103 | -0.48003 | -0.49352 | 0.54769 |         |         |                |
| G C17:1        | -0.91643 | -0.49691 | -0.54585 | -0.55849 | 0.40163 | 0.97416 |         |                |
| Total ginkgols | -0.90895 | -0.47551 | -0.5249  | -0.53795 | 0.45838 | 0.98759 | 0.99738 | 1              |
